# Supplementary material for: Influence of Aberration-Free, Narrowband Light on the Choroidal Thickness and Eye Length
Source: PubMed Central journal article supplement (PMC11055502; doi:10.1167/tvst.13.4.30), 2024-04-25
Supplement: tvst-13-4-30_s001.pdf [file tvst-13-4-30_s001.pdf]

## Supplementary Tables

**Table 1:** Axial length and choroidal thickness changes post-illumination and post-recovery period for test and control eye and choroidal thickness changes of the illuminated and non-illuminated zone for the test eye post-illumination period. Results are shown in micrometer and mean  $\pm$  standard error.

| <b>Post-illumination period</b>                                 |                                            |                             |                            |                    |
|-----------------------------------------------------------------|--------------------------------------------|-----------------------------|----------------------------|--------------------|
| <b>Illumination conditions</b>                                  | <b>Axial length</b>                        |                             | <b>Choroidal thickness</b> |                    |
|                                                                 | <b>Test eye</b>                            | <b>Control eye</b>          | <b>Test eye</b>            | <b>Control eye</b> |
| <b>Short wavelength</b>                                         | +7.4 $\pm$ 2.2                             | +3.5 $\pm$ 2.7              | +1.1 $\pm$ 2.3             | +0.6 $\pm$ 1.8     |
| <b>Long wavelength</b>                                          | +4.8 $\pm$ 1.7                             | +2.9 $\pm$ 3.3              | -5.7 $\pm$ 2.2             | -0.9 $\pm$ 1.9     |
| <b>Broadband</b>                                                | +5.1 $\pm$ 3.5                             | +5.6 $\pm$ 4.3              | +2.0 $\pm$ 2.6             | -2.2 $\pm$ 2.8     |
| <b>Post-recovery period</b>                                     |                                            |                             |                            |                    |
| <b>Illumination conditions</b>                                  | <b>Axial length</b>                        |                             | <b>Choroidal thickness</b> |                    |
|                                                                 | <b>Test eye</b>                            | <b>Control eye</b>          | <b>Test eye</b>            | <b>Control eye</b> |
| <b>Short wavelength</b>                                         | +6.5 $\pm$ 3.3                             | +5.4 $\pm$ 2.7              | -1.6 $\pm$ 2.3             | +1.8 $\pm$ 2.7     |
| <b>Long wavelength</b>                                          | +3.6 $\pm$ 2.1                             | +5.2 $\pm$ 2.1              | -3.7 $\pm$ 2.3             | +0.6 $\pm$ 2       |
| <b>Broadband</b>                                                | +3.6 $\pm$ 4.3                             | +2.9 $\pm$ 4.9              | +8.2 $\pm$ 2.7             | -3.4 $\pm$ 4       |
| <b>Illuminated and non-illuminated zone choroidal thickness</b> |                                            |                             |                            |                    |
| <b>Illumination conditions</b>                                  | <b>Test eye (post-illumination period)</b> |                             |                            |                    |
|                                                                 | <b>Illuminated zone</b>                    | <b>Non-illuminated zone</b> |                            |                    |
| <b>Short wavelength</b>                                         | +1.1 $\pm$ 2.3                             | -1.1 $\pm$ 1.8              |                            |                    |
| <b>Long wavelength</b>                                          | -5.7 $\pm$ 2.2                             | -3.5 $\pm$ 1.7              |                            |                    |
| <b>Broadband</b>                                                | +2.0 $\pm$ 2.6                             | -3.0 $\pm$ 2.1              |                            |                    |

**Table 2:** choroidal thickness changes post-illumination period for test eye in four quadrants of illuminated and non-illuminated zone.

| <b>Choroidal thickness changes post-illumination (test eye)</b> |                        |                 |                 |              |                 |
|-----------------------------------------------------------------|------------------------|-----------------|-----------------|--------------|-----------------|
|                                                                 |                        | <b>Superior</b> | <b>Inferior</b> | <b>Nasal</b> | <b>Temporal</b> |
| <b>Short wavelength</b>                                         | <b>illuminated</b>     | +0.3 ± 2.4      | +2.1 ± 4.0      | +2.1 ± 3.8   | -0.3 ± 2.1      |
|                                                                 | <b>Non-illuminated</b> | +0.2 ± 2.1      | -1.1 ± 2.4      | -2.5 ± 3.3   | -2.1 ± 2.0      |
| <b>Long wavelength</b>                                          | <b>illuminated</b>     | -8.1 ± 3.4      | -5.5 ± 2.1      | -5.7 ± 3.5   | -3.7 ± 2.2      |
|                                                                 | <b>Non-illuminated</b> | -5.3 ± 2.9      | +0.8 ± 2.1      | -6.1 ± 3.5   | -3.6 ± 1.6      |
| <b>Broadband</b>                                                | <b>illuminated</b>     | -0.4 ± 3.7      | +9.8 ± 6.4      | -2.2 ± 5.6   | +0.7 ± 4.7      |
|                                                                 | <b>Non-illuminated</b> | -3.3 ± 4.9      | -2.0 ± 2.1      | -10.0 ± 5.5  | +2.9 ± 3.1      |

**Table 3:** choroidal thickness changes post-illumination period for the control eye in four quadrants of the central 12-degree zone.

| <b>Choroidal thickness changes in the central zone post-illumination (control eye)</b> |                           |                 |              |                 |
|----------------------------------------------------------------------------------------|---------------------------|-----------------|--------------|-----------------|
|                                                                                        | <b>Central 12 degrees</b> |                 |              |                 |
|                                                                                        | <b>Superior</b>           | <b>Inferior</b> | <b>Nasal</b> | <b>Temporal</b> |
| <b>Short wavelength</b>                                                                | -2.0 ± 3.0                | +5.5 ± 3.3      | +0.9 ± 3.1   | -2.2 ± 3.5      |
| <b>Long wavelength</b>                                                                 | -1.6 ± 2.2                | -1.5 ± 2.3      | +1.2 ± 1.6   | -1.9 ± 4.2      |
| <b>Broadband</b>                                                                       | +1.8 ± 3.8                | -7.0 ± 3.8      | -1.9 ± 3.6   | -1.7 ± 2.1      |

On analysing the four different quadrants, no significant difference was observed for any of the conditions (all  $p > 0.05$ ).
